# Supplementary material
Source: Springer Nature journal article supplement (https://www.springermedizin.de/resource/supplementary/12933_2011_518_MOESM2_ESM.pdf/9538628)

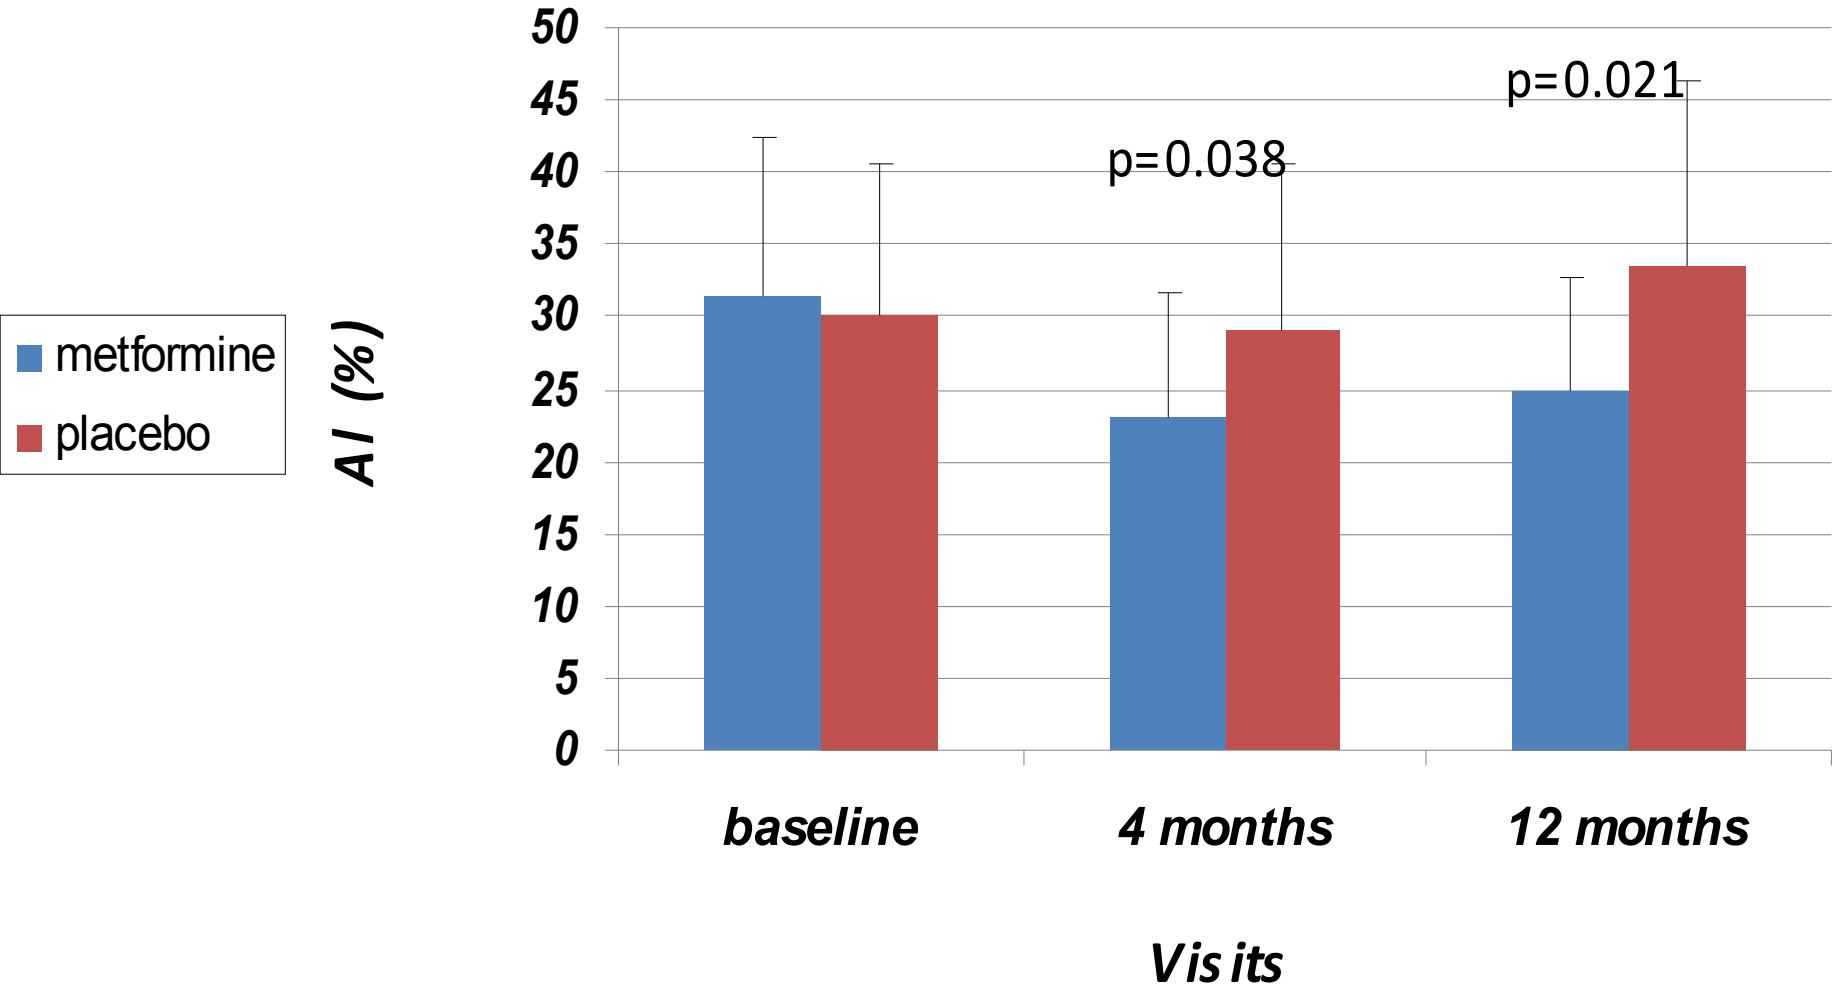

■ metformine  
■ placebo

*AI (%)*

*baseline*

*4 months*

*12 months*

*Visits*

$p=0.038$

$p=0.021$

Supplement: MOESM2 [file 9538628]
